# Supplementary material
Source: PubMed Central journal article supplement (PMC2673124)
Supplement: blood-2008-10-182709_1.pdf [file blood-2008-10-182709_1.pdf]

| Patient ID                 | A allele 1 | A allele 2 | B allele 1 | B allele 2        | DRB1 allele 1   | DRB1 allele 2      | DQB1 allele 1      | DQB1 allele 2      |
|----------------------------|------------|------------|------------|-------------------|-----------------|--------------------|--------------------|--------------------|
| <b>Elite Controllers</b>   |            |            |            |                   |                 |                    |                    |                    |
| 85                         | A*0101     | A*6801     | B*2705     | B*5707/08         | DRB1*07         | DRB1*13            | DQB1*03            | DQB1*06            |
| 1099                       | A*2402     | A*7408     | B*4102     | B*8101            | DRB1*12         | DRB1*15            | DQB1*05            | DQB1*06            |
| 1122                       | A*0201     | A*0201     | B*3501/11  | B*5101/09         | DRB1*08         | DRB1*14            | DQB1*04            | DQB1*05            |
| 1125                       | A*0301     | A*3201     | B*1503/18  | B*8101            | DRB1*03         | DRB1*13            | DQB1*02            | DQB1*06            |
| 1139                       | A*0206     | A*3101     | B*2705     | B*2723            | DRB1*04         | DRB1*14            | DQB1*03            | DQB1*03            |
| 1155                       | A*0201     | A*0201     | B*1518     | B*4402            | DRB1*04         | DRB1*15            | DQB1*03            | DQB1*06            |
| 1161                       | A*2402/50  | A*3101     | B*3502     | B*5701            | DRB1*07         | DRB1*11            | DQB1*03            | DQB1*03            |
| 1170                       | A*0206     | A*3401     | B*3802     | B*5101/12/17/21   | DRB1*15         | DRB1*15            | DQB1*05            | DQB1*05            |
| 1198                       | A*0201     | A*0301     | B*0702     | B*3501            | DRB1*01         | DRB1*15            | DQB1*05            | DQB1*06            |
| 1203                       | A*2301/11  | A*3004/06  | B*4403     | B*8101            | DRB1*07         | DRB1*09            | DQB1*02            | DBQ1*02            |
| 1511                       | A*0301     | A*3201     | B*1503/18  | B*8101            | DRB1*08         | DRB1*15            | DQB1*04            | DQB1*06            |
| 1517                       | A*0101     | A*2501     | B*1801     | B*5701            | DRB1*04         | DRB1*15            | DQB1*03            | DQB1*06            |
| 1518                       | A*1101/04  | A*3002     | B*4402     | B*5703/09         | DRB1*04         | DRB1*15            | DQB1*03            | DQB1*06            |
| 1529                       | A*0201     | A*0301     | B*1402     | B*5701            | DRB1*07         | DRB1*13            | DQB1*03            | DQB1*06            |
| 1545                       | A*3402     | A*7401     | B*4403     | B*5702            | DRB1*13         | DRB1*13            | DQB1*02            | DQB1*06            |
| 1552                       | A*2301     | A*6802     | B*4501     | B*5703            | DRB1*11         | DRB1*13            | DQB1*03            | DQB1*06            |
| 1555                       | A*2402     | A*7401     | B*0702     | B*4505 or B*5000c | DRB1*15         | DRB1*16            | DQB1*05            | DQB1*06            |
| <b>Viremic Controllers</b> |            |            |            |                   |                 |                    |                    |                    |
| 50                         | A30b       | A30        | B*0801     | B*2703            | DRB1*11         | DRB1*13            | DQB1*03            | DQB1*03            |
| 1116                       | A*0101     | A*0201     | B*3501     | B*5701            | DRB1*01         | DRB1*13            | DQB1*05            | DQB1*06            |
| 1119                       | A*0101     | A*0201     | B*4402     | B*5201            | DRB1*04         | DRB1*14            | DQB1*03            | DQB1*05            |
| 1127                       | A*0101     | A*0101     | B*0801     | B*0801            | DRB1*03         | DRB1*03            | DQB1*02            | DQB1*02            |
| 1128                       | A*3601     | A*6802     | B*5301     | B*5703            | DRB1*01         | DRB1*11            | DQB1*05            | DQB1*06            |
| 1143                       | A*0101     | A*0301     | B*0702     | B*5701            | DRB1*04         | DRB1*07            | DQB1*03            | DQB1*03            |
| 1148                       | A*0206     | A*3101     | B*1501     | B*4001            | DRB1*04         | DRB1*08            | DQB1*03            | DBQ1*04            |
| 1164                       | A*2301     | A*3101     | B*1503/64  | B*5703            | DRB1*01         | DRB1*15            | DQB1*05            | DQB1*06            |
| 1181                       | A*0301     | A*3001     | B*0706     | B*1302            | DRB1*04         | DRB1*07            | DQB1*02            | DQB1*03            |
| 1516                       | A*0301     | A*0301     | B*1402     | B*5703/09         | DRB1*01         | DRB1*15            | DQB1*05            | DQB1*06            |
| 4008                       | A*0201     | A*0206     | B*0801     | B*3701            | DRB1*01         | DRB1*03            | DQB1*02            | DQB1*05            |
| <b>Non-Controllers</b>     |            |            |            |                   |                 |                    |                    |                    |
| 56 58                      | A1b A1b    | A29 A2     | B8 B51     | B44 B58           | DRB1*03 DRB1*04 | DRB1*07<br>DRB1*11 | DQB1*02<br>DQB1*03 | DQB1*02<br>DQB1*03 |
| 65                         | A*0101     | A*0201     | B*0702     | B*0801            | DRB1*01         | DRB1*03            | DQB1*02            | DQB1*05            |
| 66                         | A*2301     | A*6802     | B*0801     | B*5101            | DRB1*01         | DRB1*07            | DQB1*02            | DQB1*05            |
| 67                         | A*1101     | A*2407     | B*1301     | B*5201            | DRB1*09         | DRB1*15            | DQB1*03            | DQB1*05            |
| 98                         | A*0201     | A*2501     | B*0801     | B*1801            | qns a           | qns                | qns                | qns                |
| 118                        | A*1102     | A*2902     | B*3501/57  | B*5001            | DRB1*04         | DRB1*07            | DQB1*02            | DQB1*03            |
| 1141                       | A*2402     | A*3002     | B*1402     | B*4005            | DRB1*14         | DRB1*15            | DQB1*03            | DQB1*06            |
| 1237                       | A*0201     | A*0201     | B*0702     | B*4402            | DRB1*01         | DRB1*04            | DQB1*03            | DQB1*05            |
| 1254                       | A*0201/73  | A*6801     | B*2717     | B*4501            | DRB1*11         | DRB1*12            | DQB1*03            | DQB1*05            |

|      |           |                    |        |              |                                 |         |         |         |
|------|-----------|--------------------|--------|--------------|---------------------------------|---------|---------|---------|
| 1259 | A*0201/73 | A*6802             | B*3805 | B*4206       | DRB1*03 or DRB1*13 <sup>c</sup> | DRB1*11 | DQB1*03 | DQB1*04 |
| 1265 | A*0101    | A*2601             | B*0801 | B*5101       | DRB1*03                         | DRB1*07 | DQB1*02 | DQB1*02 |
| 1275 | A*0201/81 | A*2402/26/32/34/39 | B*0801 | B*4002/08/11 | DRB1*07                         | DRB1*14 | DQB1*02 | DQB1*05 |
| 1562 | A*6802    | A*7401             | B*1302 | B*4201       | DRB1*01                         | DRB1*07 | DQB1*02 | DQB1*05 |

**HAART-Suppressed**

|    |                 |        |                                  |                               |         |         |         |         |
|----|-----------------|--------|----------------------------------|-------------------------------|---------|---------|---------|---------|
| 54 | A*2402          | A*6801 | B*5101                           | B*5109                        | DRB1*04 | DRB1*11 | DQB1*03 | DQB1*03 |
| 57 | A1 <sup>b</sup> | A1     | B7                               | B8                            | DRB1*07 | DRB1*15 | DQB1*02 | DQB1*06 |
| 63 | A*0101          | A*0201 | B*0801                           | B*4402                        | DRB1*03 | DRB1*04 | DQB1*02 | DQB1*03 |
| 64 | A*1102          | A*2402 | B*0702                           | B*4402                        | DRB1*12 | DRB1*15 | DQB1*03 | DQB1*06 |
| 77 | A*0202/05       | A*3301 | B*5301                           | B*5703                        | DRB1*13 | DRB1*15 | DQB1*02 | DQB1*06 |
| 80 | A*0201          | A*3101 | B*4403                           | B*5101                        | DRB1*04 | DRB1*04 | DQB1*03 | DQB1*03 |
| 83 | A*2301          | A*7401 | B*1503/63 or B*1801 <sup>c</sup> | B*1801 or B*9503 <sup>c</sup> | DRB1*11 | DRB1*14 | DQB1*03 | DQB1*05 |
| 88 | A*0201          | A*2902 | B*1401                           | B*4901                        | DRB1*04 | DRB1*07 | DQB1*02 | DQB1*03 |
| 92 | A*0201          | A*2601 | B*4001                           | B*4402                        | DRB1*04 | DRB1*13 | DQB1*03 | DQB1*06 |
| 93 | A*0101          | A*0101 | B*0801                           | B*3901/03                     | DRB1*07 | DRB1*15 | DQB1*02 | DQB1*06 |

<sup>a</sup>qns = quantity of DNA not sufficient for analysis.

<sup>b</sup>Low resolution class I typing was performed for this subject.

<sup>c</sup>Some ambiguities could not be resolved by SSP typing.
